# Supplementary material
Source: Springer Nature journal article supplement (https://www.springermedizin.de/resource/supplementary/12992_2012_187_MOESM5_ESM.pdf/9616772)
Supplement: MOESM5 [file 9616772]

Millions of U.S. Dollars, Constant 2009 Prices

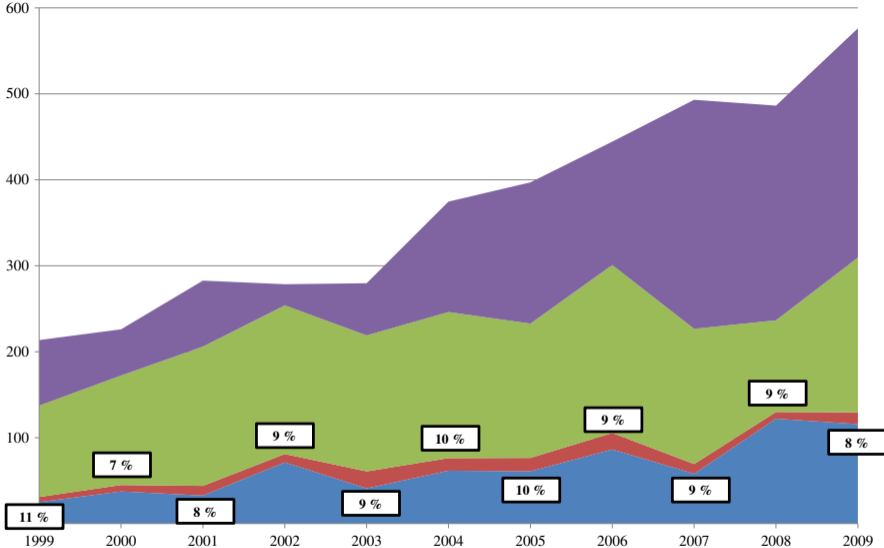

- GOU Budget Resources Appropriated to Health
- HIPC Debt Relief for Health
- On-Budget DAH (GBS + SBS-PAF + Project Support on MTEF)
- Off-Budget Project Support
- % Proportion of GOU Budget Allocated to Health
